# Supplementary material
Source: HighWire-hosted journal article supplement (https://bmjopen.bmj.com/content/11/8/e047995)
Supplement: inline-supplementary-material-1 [file inline-supplementary-material-1.pdf]

## Survey measures

### Survey 1 (pre workshop)

**1) Are you currently a Principal/Chief Investigator?**

Yes

No

**2) What is your professional role (tick one)?**

Medical doctor/consultant

Nurse

Scientist

Administrator/study manager

Statistician/data manager

Graduate student

Other (please specify)

**3) How would you describe your attitude towards Patient and Public Involvement (PPI)?**

PPI enthusiast

Interested in PPI but have not yet done it

Indifferent

Negative

**4) Do you feel able to: (please tick one or more)**

Confidently carry out PPI

Work effectively with patients, carers and public<sub>2</sub>

Run effective meetings with patients, carers and public

Listen to patients, carers and public effectively

Use patients, carers, or the public in steering groups effectively

Use tools to keep patients, carers and public interested

Provide accessible information

None of the above

Other – please explain:

**5) Do you believe you have a good understanding of what is good practice in PPI?**

Yes

No

A little

**6) Do you know what resources are available to help you with PPI?**

- Yes  
No  
A little

**7) Have you already actively involved patients, carers, or the public in your research?**

- Yes – go to a)  
No

**a) What areas did patients, carers, or the public help you with? (please tick one or more)**

- Identifying topics for research  
Prioritising research topics and aims  
Designing a research study and protocol  
Looking into the ethics of the proposed research and methods  
Writing patient information and consent forms  
Recruiting participants  
Writing grant and research proposals  
Having patients, carers, or public as co-applicants  
Disseminating results  
Other - please explain:

**Survey 2 (immediately after workshop)****1) How did you find the workshop? (Please mark the appropriate box for each row)**

|                                          | Excellent                | Good                     | Satisfactory             | Poor                     |
|------------------------------------------|--------------------------|--------------------------|--------------------------|--------------------------|
| a. Overall workshop                      | <input type="checkbox"/> | <input type="checkbox"/> | <input type="checkbox"/> | <input type="checkbox"/> |
| b. Handouts                              | <input type="checkbox"/> | <input type="checkbox"/> | <input type="checkbox"/> | <input type="checkbox"/> |
| c. Delivery and presentation of workshop | <input type="checkbox"/> | <input type="checkbox"/> | <input type="checkbox"/> | <input type="checkbox"/> |
| d. Meeting room and facilities           | <input type="checkbox"/> | <input type="checkbox"/> | <input type="checkbox"/> | <input type="checkbox"/> |
| e. Administration of workshop            | <input type="checkbox"/> | <input type="checkbox"/> | <input type="checkbox"/> | <input type="checkbox"/> |

**2) How would you describe your attitude towards Patient and Public Involvement (PPI) now you have been to this workshop?**

PPI enthusiast  
Interested in PPI but have not yet done it  
Indifferent  
Negative

**a) Has the workshop changed your attitude? (If yes, please explain)**

Yes

No

**3) Do you plan to involve patients, carers and the public in your research in the future?**

Yes - go to a) and b)

No – go to c)

**a) Will this workshop help you to action your plans?**

Yes

No

**b) How do you think this workshop will help you? (tick one or more)**

I have more of an idea about how to involve patients, carers and public  
It has given me more confidence to work with patients, carers and public  
It has given me practical tips and ideas  
I feel better equipped to work with patients, carers and public<sub>4</sub>  
Other – please explain:

**4) What abilities and skills did you learn from our workshops? (please tick one or more)**

Having confidence to carry out PPI  
Understanding how to work with patients, carers and public  
Running effective meetings with patients, carers and public  
Listening to patients, carers and public more effectively  
Using patients, carers and public in steering groups more effectively  
Gaining tools to keep patients, carers and public interested  
Providing accessible information  
None of the above  
Other – please explain

**5) Would you recommend this workshop to other researchers?**

Yes

No

**6) Now that you have attended the workshop****a) Do you believe you have a good understanding of what is good practice in PPI?**

Yes

No

A little

**b) Do you know what resources are available to help you with PPI?**

Yes

No

A little

**7) Are you currently a Principal/Chief Investigator**

Yes

No

**8) What is your professional role (tick one)?**

Medical doctor/consultant

Nurse

Scientist

Administrator/study manager

Statistician/data manager

Graduate student

Other (please specify): \_\_\_\_\_

**9) Do you have any other comments or suggestions?****Survey 3 (6 months after workshop)****1. How would you describe your attitude towards Patient and Public Involvement (PPI) since attending the workshop? (Tick one box)**

PPI enthusiast

Interested in PPI but have not yet done it

Indifferent

Negative

**2. Since you attended the workshop in <month> have you actively involved patients or the public in your research? (Tick one box)**

Yes – go to question 3 -

No, I haven't conducted any research since the workshop - go straight to question 7

No, PPI would not help my research - go straight to question 7

No, I don't feel able to actively involve the public - go straight to question 7

No, I didn't for other reasons - please specify and then go to question 7

**3. What areas did patients, carers or the public help you with? (Tick relevant boxes)**

Identifying topics for research

Prioritising research topics and aims

Designing a research study and protocol

Looking into the ethics of the proposed research and methods

Writing patient information and consent forms

Recruiting participants

Writing grant and research proposals

Having patients, carers, or public as co-applicants

Disseminating results

Other (please specify)

**4. Do you feel the workshop you attended in < month> helped you to involve patients, carers and the public in this way?**

Yes

No

**5. How did this PPI influence your research? (Tick relevant boxes)**

Patient information/consent forms were re-written

We changed or adjusted study design protocol

We changed or adjusted outcome measures

Patients/public assured us as to the ethical nature of our research and its acceptability

Patients/public gave us access to particular groups of patients and potential participants

We changed our proposed recruitment procedures

Lay people helped recruit participants

Our department/unit made changes to research strategic direction and priorities  
 PPI had no influence on our research  
 PPI influenced our research in another way (please specify)

**6. What do you anticipate will be the overall impact of this PPI will have on your research? (Tick relevant boxes)**

Better recruitment  
 Better retention  
 More meaningful outputs with research results more likely to make a difference  
 Priorities of our department/unit are more likely to be relevant to the needs of patients  
 Greater credibility with funders and stakeholders  
 Improved dissemination of research results  
 Information about research is more accessible  
 Funding grant secured  
 More rigorous research  
 No overall impact  
 PPI had a negative impact on our research

7. Which aspects of PPI do you now feel able to do and which would you like more training in?

|                                                   | Able to do this          | I need more training     |
|---------------------------------------------------|--------------------------|--------------------------|
| Confidently carry out PPI                         | <input type="checkbox"/> | <input type="checkbox"/> |
| Work effectively with patients, carers and public | <input type="checkbox"/> | <input type="checkbox"/> |
| Run effective meetings with                       | <input type="checkbox"/> | <input type="checkbox"/> |

patients, carers  
and public

Listen to  
patients, carers  
and public  
effectively

Use patients,  
carers, or the  
public in  
steering groups  
effectively

Use tools to  
keep patients,  
carers and  
public  
interested

Provide  
accessible  
information

None of the  
Above

Other

**8. Would you be interested in undertaking further training in PPI? (Tick one box)**

Yes

No

**9. If you would be interested in more training, what kind of training would you like? (Tick relevant boxes)**

More introductory sessions on PPI

More advanced training

More practical training

Training where I can look at and discuss my own PPI plans

Training conducted by patients or members of the public

Sessions where I can exchange ideas with other researchers

Other (please specify)

**10. Would you recommend the PPI workshop you attended to other researchers?**

Yes

No
